## RESEARCH ARTICLE

# Comparative analysis of efficacy of different combination therapies of $\alpha$ -receptor blockers and traditional Chinese medicine external therapy in the treatment of chronic prostatitis/chronic pelvic pain syndrome: Bayesian network meta-analysis

Kaiyu Zhang<sup>1</sup>\*, Yi Zhang<sup>1</sup>, Shengwei Hong<sup>1</sup>, Yutian Cao<sup>1</sup>, Chengjiang Liu<sup>2</sup>

**1** The First Clinical College, Nanjing University of Chinese Medicine, Nanjing, Jiangsu, China, **2** Department of General Medicine, Affiliated Anqing First People's Hospital of Anhui Medical University, Anqing, Anhui, China

\* These authors contributed equally to this work.

\* [20220206@njucm.edu.cn](mailto:20220206@njucm.edu.cn)

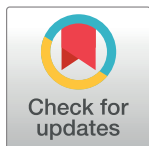

## OPEN ACCESS

**Citation:** Zhang K, Zhang Y, Hong S, Cao Y, Liu C (2023) Comparative analysis of efficacy of different combination therapies of  $\alpha$ -receptor blockers and traditional Chinese medicine external therapy in the treatment of chronic prostatitis/chronic pelvic pain syndrome: Bayesian network meta-analysis. PLoS ONE 18(4): e0280821. <https://doi.org/10.1371/journal.pone.0280821>

**Editor:** Celeste Manfredi, University of Campania Luigi Vanvitelli: Università degli Studi della Campania Luigi Vanvitelli, ITALY

**Received:** November 14, 2022

**Accepted:** March 17, 2023

**Published:** April 20, 2023

**Copyright:** © 2023 Zhang et al. This is an open access article distributed under the terms of the [Creative Commons Attribution License](https://creativecommons.org/licenses/by/4.0/), which permits unrestricted use, distribution, and reproduction in any medium, provided the original author and source are credited.

**Data Availability Statement:** All relevant data are within the paper and its [Supporting information](#) files.

**Funding:** The authors received no specific funding for this work.

**Competing interests:** The authors have declared that no competing interests exist.

## Abstract

### Background

Combination therapy of  $\alpha$ -receptor blockers ( $\alpha$ -RBs) and traditional Chinese medicine external therapy can serve as a treatment of chronic prostatitis/chronic pelvic pain syndrome (CP/CPPS).  $\alpha$ -RBs includes tamsulosin, terazosin and so on and the traditional Chinese medicine external therapy includes needling, moxibustion, acupoint catgut embedding, acupoint application, auricular point sticking and hot medicated compress and so forth. Currently, there is no study in which Bayesian network meta-analysis is applied to making a comparative analysis of efficacy of different combination therapies of  $\alpha$ -RBs and traditional Chinese medicine external therapy in the treatment of CP/CPPS. Therefore, based on Bayesian algorithm, a network meta-analysis was conducted by us to make a comparison between different combination therapies of  $\alpha$ -RBs and traditional Chinese medicine external therapy.

### Methods

A document retrieval was conducted in the databases PubMed, Cochrane Library, Embase, Web of science, China National Knowledge Infrastructure, WanFang Data Dissertations of China database, VIP China Science and Technology Journal Database, SinoMed. Literatures were searched for published in biomedical journals concerning clinical study on  $\alpha$ -RBs combined with various traditional Chinese medicine external therapies in the treatment of CP/CPPS from inception of database to July 2022. Newest version risks of bias assessment tool (RoB2) was used to assess the risks of bias of studies included in this analysis. Stata 16.0 software and R4.1.3 software were used to make a Bayesian network meta-analysis and charts.

## Results

19 literatures were included involving 1739 patients concerning 12 interventions which were used in the treatment of CP/CPPS. With respect to the total effective rate,  $\alpha$ -RBs+ needling was most likely to be the optimal treatment. Concerning National Institutes of Health Chronic Prostatitis Symptom Index (NIH-CPSI) total score,  $\alpha$ -RBs+ moxibustion+ auricular point sticking was most likely to be optimal treatment, the therapy ranking second was  $\alpha$ -RBs+ needling, and the therapy ranking third was  $\alpha$ -RBs+ moxibustion. Pain score, voiding score and quality-of-life score are subdomains of the NIH-CPSI total score. With regard to pain score,  $\alpha$ -RBs+ moxibustion was most likely to be optimal treatment. In reference to voiding and quality-of-life score, there was no statistically significant difference between the efficacy of various interventions.

## Conclusions

$\alpha$ -RBs+ needling,  $\alpha$ -RBs+ moxibustion and  $\alpha$ -RBs+ moxibustion+ auricular point sticking provided relatively good efficacy in the treatment of CP/CPPS. In these treatments, attention should be paid on  $\alpha$ -RBs+ needling and  $\alpha$ -RBs+ moxibustion which ranked higher many times in the evaluation of various outcome indicators. However, there still were certain limitations in this study, so large-sample clinical randomized control trials with a rigor design following the evidence-based medicine standards need to be conducted to justify the results of this study.

## Systematic review registration

[<https://www.crd.york.ac.uk/prospero/>], identifier: [CRD42022341824].

## Introduction

Prostatitis is one of the most common urologic diseases and is a common cause for physician visit, which National Institutes of Health (NIH) divided into four categories, acute bacterial prostatitis (category I), chronic bacterial prostatitis (category II), chronic prostatitis (CP)/chronic pelvic pain syndrome (CPPS, category III, inflammatory IIIA, non-inflammatory, IIIB) and asymptomatic inflammatory prostatitis (category IV) [1, 2].

Incidence of CP/CPPS is about 9%~16% in the world, symptoms of which nearly 50% of males experienced [3]. CP/CPPS usually was complicated with negative emotions and lower urinary tract dysfunction and (or) sexual dysfunction [4], which seriously affects the quality of life and mental health state of patients.

$\alpha$ -RBs was widely applied to the treatment of chronic non-bacterial prostatitis nowadays [5]. Although functioning as the main drug of treatment in clinical practice,  $\alpha$ -RBs cannot produce significant beneficial effectiveness relative to placebo [6]. In addition, remission of CP/CPPS occurs only during the period of administrating the  $\alpha$ -RBs, of which withdrawal tends to lead to extinction of the effect; long-term use enhances the risk of incidence of adverse events [7–9].

Traditional Chinese medicine external therapy, as a common type of non-drug treatment of CP/CPPS, can effectively relieve pelvic pain or discomfort and lower urinary tract symptoms [10–12]. Traditional Chinese medicine external therapy mainly includes needling, moxibustion, acupoint catgut embedding, acupoint application, auricular point sticking and hot

medicated compress and so on. Currently, there is no Bayesian network meta-analysis specific to make a comparative analysis of clinical efficacy of different combination therapies of  $\alpha$ -RBs and traditional Chinese medicine external therapy in the treatment of CP/CPPS in the world. Based on Bayesian algorithm, a network meta-analysis was conducted in this study to make a comparison and rank between clinical efficacy of different combination therapies of  $\alpha$ -RBs and traditional Chinese medicine external therapy in the treatment of CP/CPPS, which was expected to offer evidence-based medicine rationale for clinical application of these combination therapies.

## Methods

This study was reported in accordance with the Preferred Reporting Items for Systematic Reviews and Meta-Analysis (PRISMA) statement and registered with PROSPERO, CRD42022341824 [13].

### Inclusion and exclusion criteria

Inclusion criteria were defined as follows:

1. Subjects diagnosed with CP/CPPS [14, 15];
2. Interventions against the experimental group was  $\alpha$ -RBs (for example, tamsulosin and terazosin) combined with traditional Chinese medicine external therapy (for example, needling, moxibustion, acupoint catgut embedding, acupoint application, auricular point sticking and hot medicated compress and so on);
3. Intervention against control group was  $\alpha$ -RBs alone or traditional Chinese medicine external therapy alone;
4. Primary outcome indicators included total effective rate and National Institutes of Health Chronic Prostatitis Symptom Index (NIH-CPSI) total score, secondary outcome indicators included NIH-CPSI pain score, NIH-CPSI voiding score and quality-of-life score;
5. Randomized control study.

Exclusion criteria:

1. Studies involving patients complicated with severe psychic disorder and medical condition;
2. Studies with missing outcome data.

### Retrieval strategy

A document retrieval was conducted in the databases PubMed, Cochrane Library, Embase, Web of science, China National Knowledge Infrastructure, WanFang Data Dissertations of China database, VIP China Science and Technology Journal Database, SinoMed. Literatures were searched concerning clinical studies on  $\alpha$ -RBs combined with various traditional Chinese medicine external therapies in the treatment of CP/CPPS from inception of database to July 2022. According to criteria provided by Cochrane Collaboration, related document retrieval was conducted by the combination of manual work and using computer [16]. Literature search was conducted according to chronological sequence in reverse order, and there was no language restriction. Search term were searched with a free-text protocol and included: Chronic Prostatitis, Chronic Pelvic Pain Syndrome, Needle, Needling, Acupuncture, Electroacupunc-

ture, Acupuncture and Moxibustion, Warm Needle, Warm Needling, Fire Needle, Needle Knife, Bloodletting, Moxibustion, Hot Medicated Compress, Auricular Point Sticking, Pressing beans on ear points, Auricular points plaster therapy, Acupoint Application, Acupoint Catgut Embedding, Catgut embedding at acupoints, catgut implantation at acupoint,  $\alpha$ -antagonists,  $\alpha$  receptor antagonist,  $\alpha$  adrenergic antagonists,  $\alpha$  blocker, Tamsulosin, Flomax, Terazosin, Doxazosin, Naphidil and Selodocin.

### Data extraction and quality assessment

Two researchers (KZ, YZ) screened the literatures and excluded the literatures with insufficient key information, literatures indicating results with missing outcome data and literatures with administration of additional interventions that are inconsistent with the trial protocol by reading the abstract of literatures, the disagreement was arbitrated by a third researcher (SH). After the literature screening, these three researchers will be responsible for data extraction. Data extracted included: study author, year of publication, sample size and intervention, age, prostatitis type, country, duration of treatment, outcome indicators and the definition of "effective". Two researchers assessed respectively the studies which met inclusion and exclusion criteria independently by using newest version risks of bias assessment tool (Version 2 of the Cochrane tool for assessing risk of bias in randomized trial, RoB2) and the disagreement was adjudicated by a third researcher. 2019 revised version RoB2 is structured into 5 domains: bias arising from the randomization process, bias due to deviations from intended interventions, bias due to missing outcome data, bias in measurement of the outcome, bias in selection of the reported result. Responses to each signalling questions are mapped to a proposed judgement which is Yes (Y), Probably Yes (PY), Probably No (PN) and No Information (NI). According to responses of assessors to the signaling questions, one of three levels was assigned to risk of bias for each domain and overall: low risk of bias, some concerns and high risk of bias [17].

### Data analysis

Stata 16.0 software was used to make evidence map of the Bayesian network meta-analysis and funnel plot for comparison-correction of publication bias. R4.1.3 software was used to make Network meta-analysis and Bayesian-Markov Chain Monte Carlo framework was constructed by its getmc and rjags program package. Random-effect mode was fitted with both continuous variable and dichotomous variable, the number of chains of each model all were 4, the number of iterations was 50000 and the number of annealing was 20000. With respect to outcome indicators, odds ratio (OR) was used as effect index of dichotomous variable or count data, mean differences (MD) was used as effect index of continuous variable or measurement data and confidence interval (CI) of each effect index was 95% CIs. Consistency (consistency between direct evidence and indirect evidence) was evaluated statistically in this study and Brooks-Gelman-Rubin methods was used to secure the convergence of each comparison. In addition, consistency model was used to analyze the ranking probability. Ranking probability was calculated with surface under the cumulative ranking curve and average rank. The range of SUCRA was 0~1 and the bigger the value was, the higher its predictive value was.

## Results

### Study selection

There were 181 literatures which were correlated with this study after the repeated literatures were removed in 286 literatures which were attained from databases. According to inclusion and exclusion criteria developed in the previous stage, finally 19 literatures were included

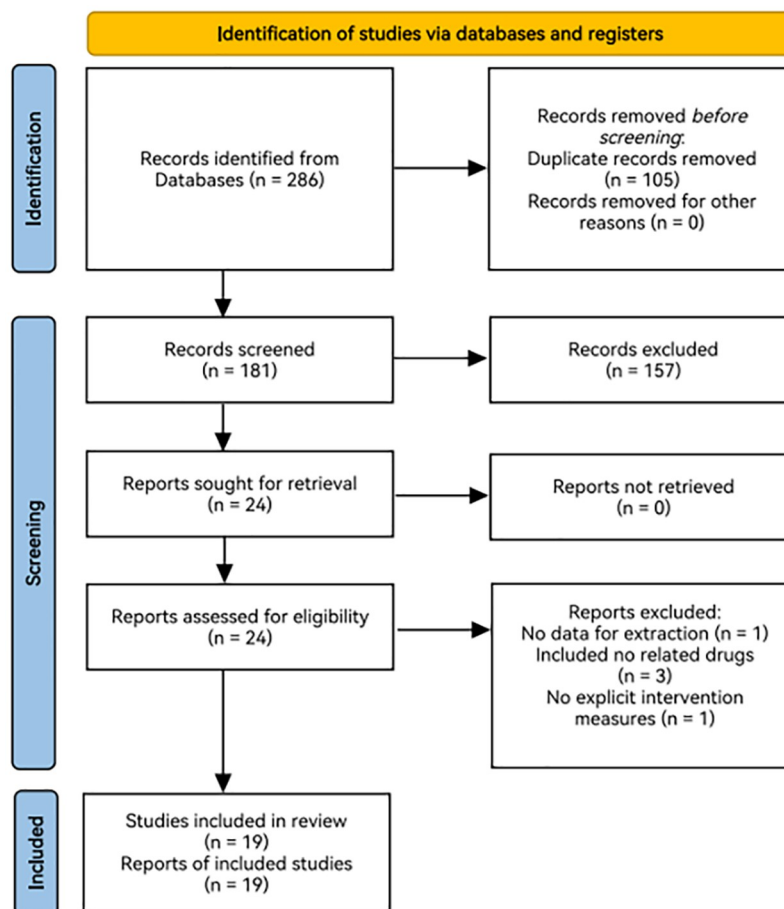

Fig 1. Study flowchart.

<https://doi.org/10.1371/journal.pone.0280821.g001>

meeting the criteria after two researchers screened literatures and excluded the literatures with insufficient key information, literatures indicating results with missing outcome data and literatures with administration of additional interventions that are inconsistent with the trial protocol by reading the abstract of these literatures. Procedures of document retrieval was showed in Fig 1 and characteristics of included studies were seen in Table 1.

## Study description

19 literatures [18–36] were included involving 1739 patients (833 cases in experimental group and 906 in control group) concerning 12 interventions used in the treatment of CP/CPPS. Range of age was about 20–70 years old and most were young and mid aged patients. In these studies,  $\alpha$ -RBs + moxibustion vs  $\alpha$ -RBs ( $n = 5$ ),  $\alpha$ -RBs+ electroacupuncture vs  $\alpha$ -RBs ( $n = 2$ ),  $\alpha$ -RBs + needling vs  $\alpha$ -RBs vs needling ( $n = 1$ ),  $\alpha$ -RBs + needling vs  $\alpha$ -RBs ( $n = 3$ ),  $\alpha$ -RBs +- acupuncture vs  $\alpha$ -RBs ( $n = 1$ ),  $\alpha$ -RBs + moxibustion+ auricular point sticking vs  $\alpha$ -RBs ( $n = 1$ ),  $\alpha$ -RBs + hot medicated compress vs  $\alpha$ -RBs ( $n = 1$ ),  $\alpha$ -RBs + acupoint catgut embedding vs  $\alpha$ -RBs ( $n = 1$ ),  $\alpha$ -RBs + acupoint catgut embedding vs  $\alpha$ -RBs vs acupoint catgut embedding ( $n = 1$ ),  $\alpha$ -RBs + acupoint application vs  $\alpha$ -RBs ( $n = 2$ ),  $\alpha$ -RBs + acupoint application vs  $\alpha$ -RBs vs acupoint application ( $n = 1$ ). All of the studies were from China and the duration of treatment was 2 weeks to 3 months, while most of the studies lasted 4 weeks. Network graphs of various outcome indicators were seen in Fig 2.

Table 1. Characteristics of included studies.

| Study ID                 | Sample size and intervention                           | Age               | Prostatitis type | Country | Duration of treatment | Outcome                                                                                          | The definition of "effective"                                                                                       |
|--------------------------|--------------------------------------------------------|-------------------|------------------|---------|-----------------------|--------------------------------------------------------------------------------------------------|---------------------------------------------------------------------------------------------------------------------|
| Hui Li, [18] 2010        | 30 $\alpha$ -RBs                                       | 31.50 $\pm$ 10.51 | CP/CPPS          | China   | 4 weeks               | Clinical effective rate, NIH-CPSI total score.                                                   | Symptoms and prostatic fluid examination indicators improved, and the NIH-CPSI total score decreased by $\geq$ 50%. |
|                          | 30 Needling                                            | 31.40 $\pm$ 10.32 |                  |         |                       |                                                                                                  |                                                                                                                     |
|                          | 30 $\alpha$ -RBs+Needling                              | 30.70 $\pm$ 9.85  |                  |         |                       |                                                                                                  |                                                                                                                     |
| Guoqin Wang, [19] 2011   | 25 $\alpha$ -RBs                                       | NR                | IIIB             | China   | 30 days               | Clinical effective rate, NIH-CPSI total score, Voiding score.                                    | Symptoms improved and the NIH-CPSI total score decreased by $\geq$ 30%.                                             |
|                          | 25 Acupoint catgut embedding                           |                   |                  |         |                       |                                                                                                  |                                                                                                                     |
|                          | 25 $\alpha$ -RBs+Acupoint catgut embedding             |                   |                  |         |                       |                                                                                                  |                                                                                                                     |
| Xingliang Qi, [20] 2012  | 30 $\alpha$ -RBs                                       | 34.77 $\pm$ 10.88 | CP/CPPS          | China   | 1 months              | NIH-CPSI total score, Pain score, Voiding score, Quality-of-Life score.                          | NR                                                                                                                  |
|                          | 30 $\alpha$ -RBs+Needling                              | 32.60 $\pm$ 7.04  |                  |         |                       |                                                                                                  |                                                                                                                     |
| Xinguo Wang, [21] 2013   | 30 $\alpha$ -RBs                                       | NR                | CP/CPPS          | China   | 8 weeks               | Clinical effective rate.                                                                         | Symptoms and prostatic fluid examination indicators improved, and the NIH-CPSI total score decreased by $\geq$ 30%. |
|                          | 30 Acupoint application                                |                   |                  |         |                       |                                                                                                  |                                                                                                                     |
|                          | 30 $\alpha$ -RBs+Acupoint application                  |                   |                  |         |                       |                                                                                                  |                                                                                                                     |
| Yue Wang, [22] 2014      | 50 $\alpha$ -RBs                                       | 36.40 $\pm$ 11.40 | CP/CPPS          | China   | 4 weeks               | Clinical effective rate, NIH-CPSI total score, Pain score, Voiding score, Quality-of-Life score. | The NIH-CPSI total score decreased by $\geq$ 30%.                                                                   |
|                          | 50 $\alpha$ -RBs+Electroacupuncture                    | 35.30 $\pm$ 12.40 |                  |         |                       |                                                                                                  |                                                                                                                     |
| Caiping Wang, [23] 2014  | 35 $\alpha$ -RBs                                       | 27.68 $\pm$ 3.60  | CP/CPPS          | China   | 4 weeks               | Clinical effective rate, NIH-CPSI total score.                                                   | The NIH-CPSI total score decreased by $\geq$ 5 points.                                                              |
|                          | 45 $\alpha$ -RBs+Moxibustion+ Auricular point sticking | 28.42 $\pm$ 4.36  |                  |         |                       |                                                                                                  |                                                                                                                     |
| Shan Gao, [24] 2015      | 46 $\alpha$ -RBs                                       | 66 $\pm$ 4        | CP/CPPS          | China   | 4 weeks               | Clinical effective rate.                                                                         | The NIH-CPSI total score decreased by $\geq$ 25%.                                                                   |
|                          | 47 $\alpha$ -RBs+Acupuncture                           | 63 $\pm$ 6        |                  |         |                       |                                                                                                  |                                                                                                                     |
| Guodong Li, [25] 2015    | 40 $\alpha$ -RBs                                       | 49.20 $\pm$ 11.50 | CP/CPPS          | China   | 4 weeks               | Clinical effective rate, NIH-CPSI total score, Pain score                                        | The NIH-CPSI total score decreased by $\geq$ 25%.                                                                   |
|                          | 40 $\alpha$ -RBs+Moxibustion                           | 50.30 $\pm$ 9.70  |                  |         |                       |                                                                                                  |                                                                                                                     |
| Ruimin Zhang, [26] 2017  | 45 $\alpha$ -RBs                                       | 48.02 $\pm$ 9.16  | CP/CPPS          | China   | 2 weeks               | Clinical effective rate, NIH-CPSI total score.                                                   | Symptoms and prostatic fluid examination indicators improved.                                                       |
|                          | 45 $\alpha$ -RBs+Acupoint application                  | 47.71 $\pm$ 8.13  |                  |         |                       |                                                                                                  |                                                                                                                     |
| Jiang Guo, [27] 2018     | 120 $\alpha$ -RBs                                      | NR                | CP/CPPS          | China   | 30 days               | Clinical effective rate, NIH-CPSI total score, Pain score, Voiding score, Quality-of-Life score. | The NIH-CPSI total score decreased by $\geq$ 25%.                                                                   |
|                          | 120 $\alpha$ -RBs+Moxibustion                          |                   |                  |         |                       |                                                                                                  |                                                                                                                     |
| Biaotai Li, [28] 2018    | 50 $\alpha$ -RBs                                       | 32.20 $\pm$ 3.90  | CP/CPPS          | China   | 20 days               | Clinical effective rate, NIH-CPSI total score.                                                   | Symptoms and prostatic fluid examination indicators improved.                                                       |
|                          | 50 $\alpha$ -RBs+Moxibustion                           | 32.40 $\pm$ 3.70  |                  |         |                       |                                                                                                  |                                                                                                                     |
| Shuying Zhang, [29] 2018 | 60 $\alpha$ -RBs                                       | 25.22 $\pm$ 6.97  | CP/CPPS          | China   | 2 weeks               | NIH-CPSI total score, Quality-of-Life score.                                                     | The NIH-CPSI total score decreased by $\geq$ 30%.                                                                   |
|                          | 60 $\alpha$ -RBs+Hot medicated compress                | 24.65 $\pm$ 7.59  |                  |         |                       |                                                                                                  |                                                                                                                     |

(Continued)

Table 1. (Continued)

| Study ID                | Sample size and intervention               | Age               | Prostatitis type | Country | Duration of treatment | Outcome                                                                                          | The definition of "effective"                                             |
|-------------------------|--------------------------------------------|-------------------|------------------|---------|-----------------------|--------------------------------------------------------------------------------------------------|---------------------------------------------------------------------------|
| Yanxia Zhu, [30] 2019   | 30 $\alpha$ -RBs                           | 43.00 $\pm$ 11.90 | CP/CPPS          | China   | 8 weeks               | Clinical effective rate, NIH-CPSI total score.                                                   | Symptoms and prostatic fluid examination indicators improved.             |
|                         | 30 $\alpha$ -RBs+Needling                  | 42.60 $\pm$ 11.80 |                  |         |                       |                                                                                                  |                                                                           |
| Yuanzhu Chen, [31] 2019 | 18 $\alpha$ -RBs                           | 38.25 $\pm$ 4.63  | CP/CPPS          | China   | 3 weeks               | Clinical effective rate, NIH-CPSI total score, Pain score, Voiding score, Quality-of-Life score. | Symptoms improved and the NIH-CPSI total score decreased by $\geq 30\%$ . |
|                         | 18 $\alpha$ -RBs+Needling                  | 36.81 $\pm$ 4.35  |                  |         |                       |                                                                                                  |                                                                           |
| Wei Gao, [32] 2020      | 50 $\alpha$ -RBs                           | 32.30 $\pm$ 9.20  | CP/CPPS          | China   | 12 weeks              | Clinical effective rate, NIH-CPSI Total score, Pain score, Voiding score, Quality-of-Life score. | The NIH-CPSI total score decreased by $\geq 30\%$ .                       |
|                         | 50 $\alpha$ -RBs+Moxibustion               | 30.20 $\pm$ 8.90  |                  |         |                       |                                                                                                  |                                                                           |
| Li Zeng, [33] 2021      | 15 $\alpha$ -RBs                           | 54.53 $\pm$ 5.62  | CP/CPPS          | China   | 2 weeks               | Clinical effective rate, NIH-CPSI total score.                                                   | Symptoms improved and the NIH-CPSI total score decreased by $\geq 30\%$ . |
|                         | 15 $\alpha$ -RBs+Moxibustion               | 52.80 $\pm$ 7.46  |                  |         |                       |                                                                                                  |                                                                           |
| Qifang Liang, [34] 2021 | 30 $\alpha$ -RBs                           | 42 $\pm$ 13       | CP/CPPS          | China   | 90 days               | Clinical effective rate, NIH-CPSI total score.                                                   | Symptoms have improved.                                                   |
|                         | 31 $\alpha$ -RBs+Electroacupuncture        | 42 $\pm$ 13       |                  |         |                       |                                                                                                  |                                                                           |
| Zhiping Wang, [35] 2021 | 42 $\alpha$ -RBs                           | 41.93 $\pm$ 4.13  | CP/CPPS          | China   | 4 weeks               | Clinical effective rate.                                                                         | Symptoms and prostatic fluid examination indicators improved.             |
|                         | 42 $\alpha$ -RBs+Acupoint application      | 42.11 $\pm$ 4.32  |                  |         |                       |                                                                                                  |                                                                           |
| Jungang Lu, [36] 2021   | 75 $\alpha$ -RBs                           | 33.60 $\pm$ 1.98  | IIIB             | China   | 4 weeks               | Clinical effective rate, NIH-CPSI total score, Pain score, Voiding score, Quality-of-Life score. | Symptoms have improved.                                                   |
|                         | 75 $\alpha$ -RBs+Acupoint catgut embedding | 36.04 $\pm$ 0.27  |                  |         |                       |                                                                                                  |                                                                           |

$\alpha$ -RBs,  $\alpha$ -Receptor Blockers; CP/CPPS, Chronic prostatitis/Chronic pelvic pain syndrome; NIH-CPSI, National Institutes of Health Chronic Prostatitis Symptom Index.

<https://doi.org/10.1371/journal.pone.0280821.t001>

## Quality assessment

Two researchers assessed respectively the risk of bias of the studies included by using newest version risks of bias assessment tool (Version 2 of the Cochrane tool for assessing risk of bias in randomized trial, RoB2). Assessing items were as follows:

1. There existed some concerns arising from the randomization process for all studies [18–36], 11 studies [18, 19, 21, 22, 25, 27, 29, 30, 32, 33, 35] did not disclose specific randomization methods, 10 studies [18–22, 25–27, 29, 32] did not disclose the allocation hiding or not, and 9 studies [23, 24, 28, 30, 31, 33–36] did not carry out allocation hiding;
2. There were low risk due to deviations from intended interventions for 17 studies and some concerns for 2 studies [24, 34] (dropout);
3. All studies were at low risk due to missing outcome data (data for outcomes were available for all participants randomized);
4. One study had low risk in measurement of the outcome and 18 studies had some concerns in measurement of the outcome (outcome assessors were not blinded) [34];
5. There existed some concerns in selection of the reported result for all studies (pre-specified plan that was finalized before unblinded outcome data were available for analysis was unclear). Risk of bias graphs were seen in Fig 3.



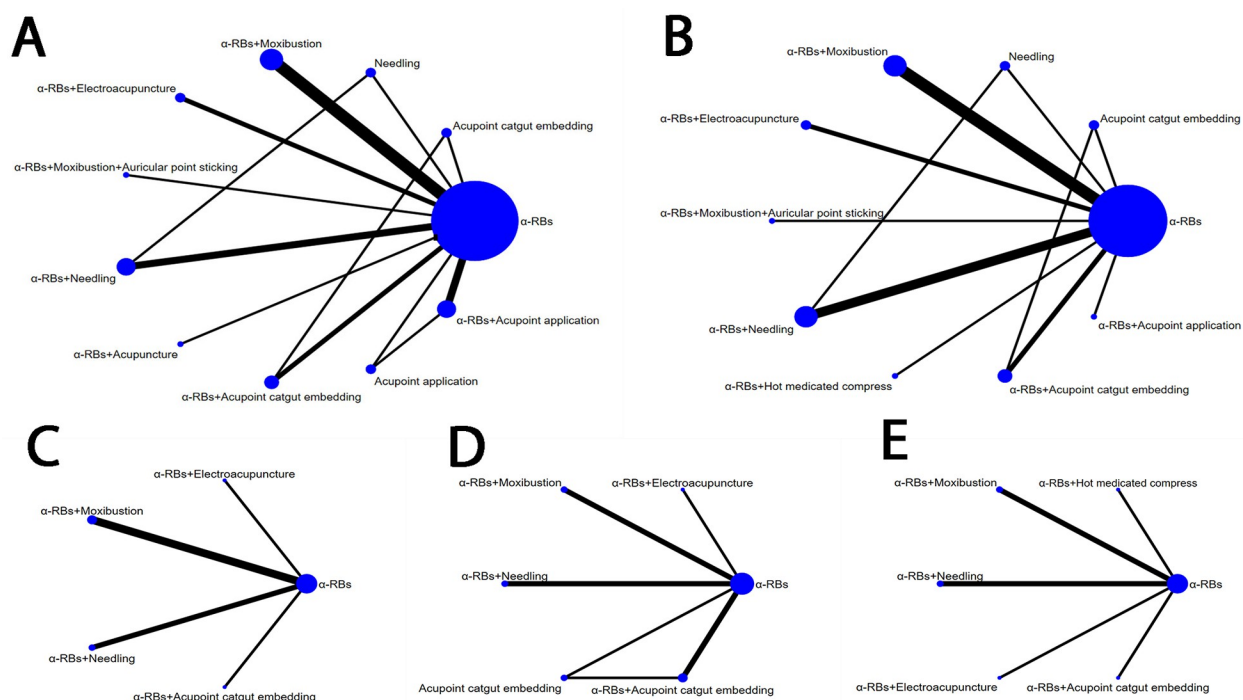

**Fig 2. Network graphs for various outcomes.** (A) Clinical effective rate;(B) NIH-CPSI Total Score;(C) Pain Score;(D) Voiding Score;(E) Quality-of-Life Score.  $\alpha$ -RBs,  $\alpha$ -Receptor Blockers.

<https://doi.org/10.1371/journal.pone.0280821.g002>

## Outcomes

**Clinical effective rate.** 17 studies were included in total ( $n = 1559$ ) involving 11 interventions. At the end of course of therapy,  $\alpha$ -RBs combined with traditional Chinese medicine external therapy was superior to  $\alpha$ -RBs alone or traditional Chinese medicine external therapy alone with respect to the indicators of clinical effective rate. Based on results of network meta-analysis,  $\alpha$ -RB+ needling (OR: -2.32;95%CrI, -3.52 to -1.31) was superior to  $\alpha$ -RBs alone.

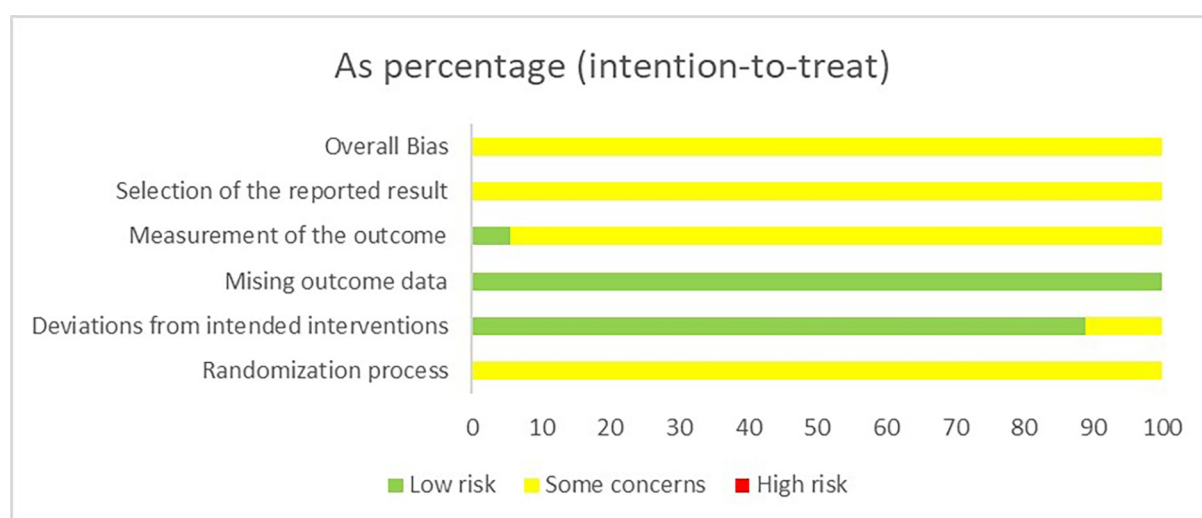

**Fig 3. Risk of bias graph.**

<https://doi.org/10.1371/journal.pone.0280821.g003>



There was statistical significance in the difference between the above interventions ( $P < 0.05$ ) while there was no statistical significance in the difference between the other interventions. According to the ranking possibility,  $\alpha$ -RBs+ needling was ranked No. 1 (95.10%). Results of comparison and rank between interventions were shown in [Table 2](#).

**NIH-CPSI total score.** 16 studies were included in total ( $n = 1472$ ) involving 10 interventions. At the end of course of therapy, in reference to indicators of NIH-CPSI total score,  $\alpha$ -RBs combined with traditional Chinese medicine external therapy was superior to  $\alpha$ -RBs alone or traditional Chinese medicine external therapy alone. Based on results of network meta-analysis,  $\alpha$ -RBs+ moxibustion (MD:5.04;95%CrI,2.19 to 7.71),  $\alpha$ -RBs+ moxibustion + auricular point sticking (MD:6.59;95%CrI,0.66 to 12.56),  $\alpha$ -RBs+ electroacupuncture (MD:4.80;95%CrI,0.35 to 9.56) and  $\alpha$ -RBs+ needling (MD:5.56;95%CrI,2.21 to 8.93) were all superior to  $\alpha$ -RBs alone. There were statistical significance in difference between the above interventions ( $P < 0.05$ ) while there were no statistical significance in difference between the other interventions. According to the ranking possibility,  $\alpha$ -RBs+ moxibustion+ auricular point pressing (79.21%) was ranked No. 1 and the therapy ranking second was  $\alpha$ -RBs+ needling (72.54%) and the therapy ranking third was  $\alpha$ -RBs+ moxibustion (65.93%). Results of comparison and rank between interventions were shown in [Table 3](#).

**Pain score.** 7 studies were included in total ( $n = 766$ ) including 5 interventions. At the end of course of therapy, in reference to indicators of NIH-CPSI pain score,  $\alpha$ -RBs combined with traditional Chinese medicine external therapy was superior to  $\alpha$ -RBs alone or traditional Chinese medicine external therapy alone.  $\alpha$ -RBs+ moxibustion (MD:2.86;95%CrI,0.21 to 5.57) was superior to  $\alpha$ -RBs alone. There was statistical significance in the difference between the above interventions ( $P < 0.05$ ) while there was no statistical significance in the difference between the other interventions. According to ranking probability,  $\alpha$ -RBs+ moxibustion (77.93%) was ranked No.1. Results of comparison and rank between interventions were shown in [Table 4](#).

**Voiding score.** 7 studies ( $n = 761$ ) were included in total involving 6 interventions. At the end of course of therapy, in reference to indicators of NIH-CPSI voiding score,  $\alpha$ -RBs combined with traditional Chinese medicine external therapy was superior to  $\alpha$ -RBs alone. However, there was no statistical significance in the difference between various interventions ( $P > 0.05$ ). Results of comparison and rank between interventions were shown in [Table 5](#).

**Quality-of-Life score.** 7 studies ( $n = 806$ ) were included in total including 6 interventions. At the end of course of therapy, in reference to indicators of NIH-CPSI quality-of-life score,  $\alpha$ -RBs combined with traditional Chinese medicine external therapy was superior to  $\alpha$ -RBs alone. However, there was no statistical significance in the difference between various interventions ( $P > 0.05$ ). Results of comparison and rank between interventions were shown in [Table 6](#).

**Safety.** In 19 studies, adverse reaction was not mentioned in 14 studies, the existence of adverse reaction was denied in one study and the incidence of adverse reaction in the most of experimental group was less than that of control group in the remaining 4 studies, which suggested that safety of combination therapy of  $\alpha$ -RBs and traditional Chinese medicine external therapy was relatively good.

**Publication bias.** Funnel plots of 5 results were shown in [Fig 4](#) which were used to evaluate publication bias. There may exist certain publication bias, which was suggested by symmetry of all funnel plots which was not good enough.

## Discussion

Bayesian algorithm has certain advantages over frequentists': confidence interval got by frequentists' algorithm cannot be explained by possibility and framing of decision supporting the

Table 2. Results of network meta-analysis. (Clinical effective rate).

| Clinical effective rate      |                                                  |                                             |                                   |                                                    |                                                                                |                                                                |                                                           |                                            |                                                    |  |
|------------------------------|--------------------------------------------------|---------------------------------------------|-----------------------------------|----------------------------------------------------|--------------------------------------------------------------------------------|----------------------------------------------------------------|-----------------------------------------------------------|--------------------------------------------|----------------------------------------------------|--|
| Needling<br>(SUCRA = 42.49%) |                                                  |                                             |                                   |                                                    |                                                                                |                                                                |                                                           |                                            |                                                    |  |
| 0.92 (-0.88, 2.77)           | Acupoint catgut<br>embedding<br>(SUCRA = 13.89%) |                                             |                                   |                                                    |                                                                                |                                                                |                                                           |                                            |                                                    |  |
| 0.94 (-0.73, 2.56)           | 0.02 (-1.81, 1.77)                               | Acupoint<br>application<br>(SUCRA = 12.55%) |                                   |                                                    |                                                                                |                                                                |                                                           |                                            |                                                    |  |
| 0.75 (-0.42, 1.94)           | -0.18 (-1.54, 1.18)                              | -0.19 (-1.34, 1.01)                         | $\alpha$ -RBs<br>(SUCRA = 14.93%) |                                                    |                                                                                |                                                                |                                                           |                                            |                                                    |  |
| -0.68 (-1.98, 0.66)          | -1.59 (-3.09, -0.13)                             | -1.61 (-2.90, -0.27)                        | -1.42 (-2.02, -0.84)              | $\alpha$ -RBs<br>+ Moxibustion<br>(SUCRA = 70.48%) |                                                                                |                                                                |                                                           |                                            |                                                    |  |
| -0.47 (-2.32, 1.32)          | -1.39 (-3.43, 0.52)                              | -1.42 (-3.22, 0.38)                         | -1.21 (-2.65, 0.14)               | 0.21 (-1.35, 1.70)                                 | $\alpha$ -RBs+Moxibustion<br>+ Auricular point<br>sticking<br>(SUCRA = 60.57%) |                                                                |                                                           |                                            |                                                    |  |
| -0.23 (-1.67, 1.24)          | -1.14 (-2.76, 0.42)                              | -1.15 (-2.58, 0.33)                         | -0.97 (-1.86, -0.09)              | 0.45 (-0.61, 1.52)                                 | 0.24 (-1.38, 1.95)                                                             | $\alpha$ -RBs<br>+ Electroacupuncture<br>(SUCRA = 50.75%)      |                                                           |                                            |                                                    |  |
| -0.72 (-2.35, 0.84)          | -1.65 (-3.23, -0.15)                             | -1.67 (-3.27, -0.07)                        | -1.46 (-2.63, -0.44)              | -0.04 (-1.34, 1.14)                                | -0.26 (-2.03, 1.49)                                                            | $\alpha$ -RBs+Acupoint<br>catgut embedding<br>(SUCRA = 71.10%) |                                                           |                                            |                                                    |  |
| -0.67 (-2.11, 0.78)          | -1.59 (-3.20, -0.01)                             | -1.60 (-2.87, -0.35)                        | -1.41 (-2.30, -0.58)              | 0.01 (-1.08, 1.04)                                 | -0.20 (-1.84, 1.47)                                                            | -0.44 (-1.69, 0.77)                                            | $\alpha$ -RBs+Acupoint<br>application<br>(SUCRA = 69.44%) |                                            |                                                    |  |
| -1.58 (-2.96, -0.30)         | -2.50 (-4.28, -0.81)                             | -2.51 (-4.16, -0.94)                        | -2.32 (-3.52, -1.31)              | -0.90 (-2.23, 0.28)                                | -1.11 (-2.90, 0.68)                                                            | -1.35 (-2.83, -0.01)                                           | -0.86 (-2.40, 0.72)                                       | $\alpha$ -RBs+Needling<br>(SUCRA = 95.10%) |                                                    |  |
| -0.15 (-2.01, 1.61)          | -1.07 (-3.08, 0.86)                              | -1.08 (-2.92, 0.69)                         | -0.89 (-2.31, 0.43)               | 0.53 (-1.00, 1.99)                                 | 0.32 (-1.60, 2.29)                                                             | 0.07 (-1.57, 1.65)                                             | 0.58 (-1.20, 2.33)                                        | 1.42 (-0.28, 3.23)                         | $\alpha$ -RBs<br>+ Acupuncture<br>(SUCRA = 48.70%) |  |

 $\alpha$ -RBs,  $\alpha$ -Receptor Blockers<https://doi.org/10.1371/journal.pone.0280821.t002>

Table 3. Results of network meta-analysis. (NIH-CPSI Total Score).

| NIH-CPSI Total Score         |                                                  |                                  |                                                   |                                                                                   |                                                           |                                                                |                                                                |                                                           |                                            |  |
|------------------------------|--------------------------------------------------|----------------------------------|---------------------------------------------------|-----------------------------------------------------------------------------------|-----------------------------------------------------------|----------------------------------------------------------------|----------------------------------------------------------------|-----------------------------------------------------------|--------------------------------------------|--|
| Needling<br>(SUCRA = 45.63%) | Acupoint catgut<br>embedding<br>(SUCRA = 21.77%) | $\alpha$ -RBs<br>(SUCRA = 9.04%) | $\alpha$ -RBs<br>+Moxibustion<br>(SUCRA = 65.93%) | $\alpha$ -RBs<br>+Moxibustion<br>+Auricular point<br>sticking<br>(SUCRA = 79.21%) | $\alpha$ -RBs<br>+ Electroacupuncture<br>(SUCRA = 61.17%) | $\alpha$ -RBs+Hot<br>medicated<br>compress<br>(SUCRA = 45.74%) | $\alpha$ -RBs+Acupoint<br>catgut embedding<br>(SUCRA = 56.27%) | $\alpha$ -RBs+Acupoint<br>application<br>(SUCRA = 41.69%) | $\alpha$ -RBs+Needling<br>(SUCRA = 72.54%) |  |
| -2.42 (-10.86, 5.97)         | -0.94 (-6.76, 4.87)                              | 5.04 (2.19, 7.71)                | 1.54 (-4.91, 8.23)                                | -1.79 (-9.20, 5.88)                                                               | -1.45 (-9.26, 6.05)                                       | 0.93 (-6.55, 8.35)                                             | -1.32 (-8.87, 6.19)                                            | 2.60 (-4.47, 9.66)                                        |                                            |  |
| -3.36 (-9.45, 2.68)          | 4.09 (-2.44, 10.47)                              |                                  |                                                   |                                                                                   |                                                           |                                                                |                                                                |                                                           |                                            |  |
| 1.67 (-5.07, 8.25)           | 5.66 (-2.68, 13.95)                              | 6.59 (0.66, 12.56)               |                                                   |                                                                                   |                                                           |                                                                |                                                                |                                                           |                                            |  |
| 3.23 (-5.28, 11.76)          | 3.85 (-3.45, 11.46)                              | 4.80 (0.35, 9.56)                | -0.24 (-5.36, 5.38)                               | -3.24 (-11.81, 5.24)                                                              | -1.79 (-9.20, 5.88)                                       | -1.45 (-9.26, 6.05)                                            | -1.32 (-8.87, 6.19)                                            |                                                           |                                            |  |
| 1.45 (-6.06, 9.20)           | 2.40 (-6.04, 10.87)                              | 3.36 (-2.75, 9.44)               | -1.69 (-8.28, 5.10)                               | -2.31 (-9.69, 5.02)                                                               | -1.45 (-9.26, 6.05)                                       | 0.93 (-6.55, 8.35)                                             | -1.32 (-8.87, 6.19)                                            |                                                           |                                            |  |
| 0.01 (-8.64, 8.54)           | 3.34 (-2.52, 9.17)                               | 4.29 (-0.03, 8.61)               | -0.76 (-5.78, 4.50)                               | -3.64 (-12.23, 4.97)                                                              | -1.45 (-9.26, 6.05)                                       | 0.93 (-6.55, 8.35)                                             | -1.32 (-8.87, 6.19)                                            |                                                           |                                            |  |
| 0.92 (-6.53, 8.35)           | 2.01 (-6.50, 10.54)                              | 2.97 (-3.22, 9.16)               | -2.08 (-8.75, 4.79)                               | -1.03 (-7.90, 5.82)                                                               | -1.45 (-9.26, 6.05)                                       | 0.93 (-6.55, 8.35)                                             | -1.32 (-8.87, 6.19)                                            |                                                           |                                            |  |
| -0.40 (-9.08, 8.20)          | 4.61 (-2.13, 11.33)                              | 5.56 (2.21, 8.93)                | 0.52 (-3.71, 4.99)                                |                                                                                   |                                                           |                                                                |                                                                |                                                           |                                            |  |
| 2.21 (-3.92, 8.30)           |                                                  |                                  |                                                   |                                                                                   |                                                           |                                                                |                                                                |                                                           |                                            |  |

$\alpha$ -RBs,  $\alpha$ -Receptor Blockers; NIH-CPSI, National Institutes of Health Chronic Prostatitis Symptom Index.

<https://doi.org/10.1371/journal.pone.0280821.t003>

**Table 4. Results of network meta-analysis. (Pain Score).**

| Pain Score                                          |                                                                      |                                                                              |                                                                                   |                                                              |
|-----------------------------------------------------|----------------------------------------------------------------------|------------------------------------------------------------------------------|-----------------------------------------------------------------------------------|--------------------------------------------------------------|
| <b><math>\alpha</math>-RBs<br/>(SUCRA = 16.81%)</b> |                                                                      |                                                                              |                                                                                   |                                                              |
| 2.86 (0.21, 5.57)                                   | <b><math>\alpha</math>-RBs<br/>+Moxibustion<br/>(SUCRA = 77.93%)</b> |                                                                              |                                                                                   |                                                              |
| 1.59 (-3.00, 6.20)                                  | - 1.27 (-6.58, 4.05)                                                 | <b><math>\alpha</math>-RBs<br/>+ Electroacupuncture<br/>(SUCRA = 51.85%)</b> |                                                                                   |                                                              |
| 0.45 (-4.07, 4.96)                                  | -2.41 (-7.69, 2.84)                                                  | - 1.14 (-7.63, 5.26)                                                         | <b><math>\alpha</math>-RBs+Acupoint<br/>catgut embedding<br/>(SUCRA = 31.35%)</b> |                                                              |
| 2.62 (-0.72, 5.78)                                  | -0.25 (-4.53, 3.88)                                                  | 1.03 (-4.71, 6.56)                                                           | 2.17 (-3.47, 7.65)                                                                | <b><math>\alpha</math>-RBs+Needling<br/>(SUCRA = 72.06%)</b> |

$\alpha$ -RBs,  $\alpha$ -Receptor Blockers

<https://doi.org/10.1371/journal.pone.0280821.t004>

decision is incorporated into the Bayesian algorithm [37]. When the numbers of studies are modicum, the credibility of results achieved by Bayesian algorithm is higher than that by frequentists' algorithm.

Effect of 12 common interventions against CP/CPPS were evaluated systematically by Bayesian network meta-analysis with 19 related studies and 5 outcome indicators in this study. 12 interventions can be divided into three types in general ( $\alpha$ -RBs alone, traditional Chinese medicine external therapy alone and combination therapy).

Based on the results of network meta-analysis, there was no significant difference between  $\alpha$ -RBs alone and traditional Chinese medicine external therapy alone while combination therapy of  $\alpha$ -RBs and traditional Chinese medicine external therapy was superior to  $\alpha$ -RBs alone or traditional Chinese medicine external therapy alone with respective to all outcomes. With regard to clinical effective rate, the efficacy of  $\alpha$ -RBs+ needling was significantly superior to that of  $\alpha$ -RBs. As for NIH-CPSI total score, the efficacy of  $\alpha$ -RBs+ moxibustion,  $\alpha$ -RBs

**Table 5. Results of network meta-analysis. (Voiding Score).**

| Voiding Score                                             |                                                         |                                                                 |                                                                         |                                                                                   |                                                              |
|-----------------------------------------------------------|---------------------------------------------------------|-----------------------------------------------------------------|-------------------------------------------------------------------------|-----------------------------------------------------------------------------------|--------------------------------------------------------------|
| <b>Acupoint catgut<br/>embedding<br/>(SUCRA = 23.34%)</b> |                                                         |                                                                 |                                                                         |                                                                                   |                                                              |
| 0.05 (-3.78, 4.00)                                        | <b><math>\alpha</math>-RBs<br/>(SUCRA = 18<br/>39%)</b> |                                                                 |                                                                         |                                                                                   |                                                              |
| 2.76 (-1.99, 7.57)                                        | 2.70 (-0.13, 5.48)                                      | <b><math>\alpha</math>-RBs+Moxibustion<br/>(SUCRA = 81.14%)</b> |                                                                         |                                                                                   |                                                              |
| 1.56 (-3.92, 7.20)                                        | 1.51 (-2.45, 5.51)                                      | - 1.20 (-5.99, 3.72)                                            | <b><math>\alpha</math>-RBs+ Electroacupuncture<br/>(SUCRA = 55.21%)</b> |                                                                                   |                                                              |
| 2.29 (-1.57, 6.11)                                        | 2.24 (-0.72, 5.07)                                      | -0.47 (-4.53, 3.53)                                             | 0.73 (-4.26, 5.56)                                                      | <b><math>\alpha</math>-RBs+Acupoint catgut<br/>embedding<br/>(SUCRA = 72.43%)</b> |                                                              |
| 1.27 (-3.49, 6.16)                                        | 1.22 (-1.63, 4.06)                                      | - 1.48 (-5.45, 2.55)                                            | -0.29 (-5.21, 4.56)                                                     | - 1.01 (-5.03, 3.11)                                                              | <b><math>\alpha</math>-RBs+Needling<br/>(SUCRA = 49.48%)</b> |

$\alpha$ -RBs,  $\alpha$ -Receptor Blockers

<https://doi.org/10.1371/journal.pone.0280821.t005>

Table 6. Results of network meta-analysis. (Quality-of-Life Score).

| Quality-of-Life Score             |                                               |                                                       |                                                             |                                                                |                                            |
|-----------------------------------|-----------------------------------------------|-------------------------------------------------------|-------------------------------------------------------------|----------------------------------------------------------------|--------------------------------------------|
| $\alpha$ -RBs<br>(SUCRA = 13.58%) |                                               |                                                       |                                                             |                                                                |                                            |
| 1.55 (-1.05, 4.10)                | $\alpha$ -RBs+Moxibustion<br>(SUCRA = 55.68%) |                                                       |                                                             |                                                                |                                            |
| 0.51 (-3.17, 4.14)                | -1.05 (-5.49, 3.45)                           | $\alpha$ -RBs+ Electroacupuncture<br>(SUCRA = 30.65%) |                                                             |                                                                |                                            |
| 1.89 (-1.79, 5.55)                | 0.34 (-4.14, 4.82)                            | 1.39 (-3.81, 6.56)                                    | $\alpha$ -RBs+Hot medicated<br>compress<br>(SUCRA = 63.46%) |                                                                |                                            |
| 1.65 (-1.96, 5.27)                | 0.09 (-4.31, 4.58)                            | 1.15 (-3.99, 6.28)                                    | -0.25 (-5.38, 4.92)                                         | $\alpha$ -RBs+Acupoint catgut<br>embedding<br>(SUCRA = 57.53%) |                                            |
| 2.49 (-0.20, 5.03)                | 0.95 (-2.78, 4.55)                            | 1.99 (-2.58, 6.44)                                    | 0.61 (-3.95, 5.04)                                          | 0.85 (-3.66, 5.25)                                             | $\alpha$ -RBs+Needling<br>(SUCRA = 79.10%) |

 $\alpha$ -RBs,  $\alpha$ -Receptor Blockers<https://doi.org/10.1371/journal.pone.0280821.t006>

+ moxibustion+ auricular point sticking,  $\alpha$ -RBs+ electroacupuncture, and  $\alpha$ -RBs+ needling were significantly superior to that of  $\alpha$ -RBs. In regard to pain score, the efficacy of  $\alpha$ -RBs + moxibustion was significantly superior to that of  $\alpha$ -RBs. The above difference had statistical significance ( $P < 0.05$ ). With respect to voiding and quality-of-life score, there was no significant difference between the efficacy of combination therapies of  $\alpha$ -RBs and traditional Chinese medicine external therapy and the use of  $\alpha$ -RBs alone or traditional Chinese medicine external therapy alone ( $P > 0.05$ ).

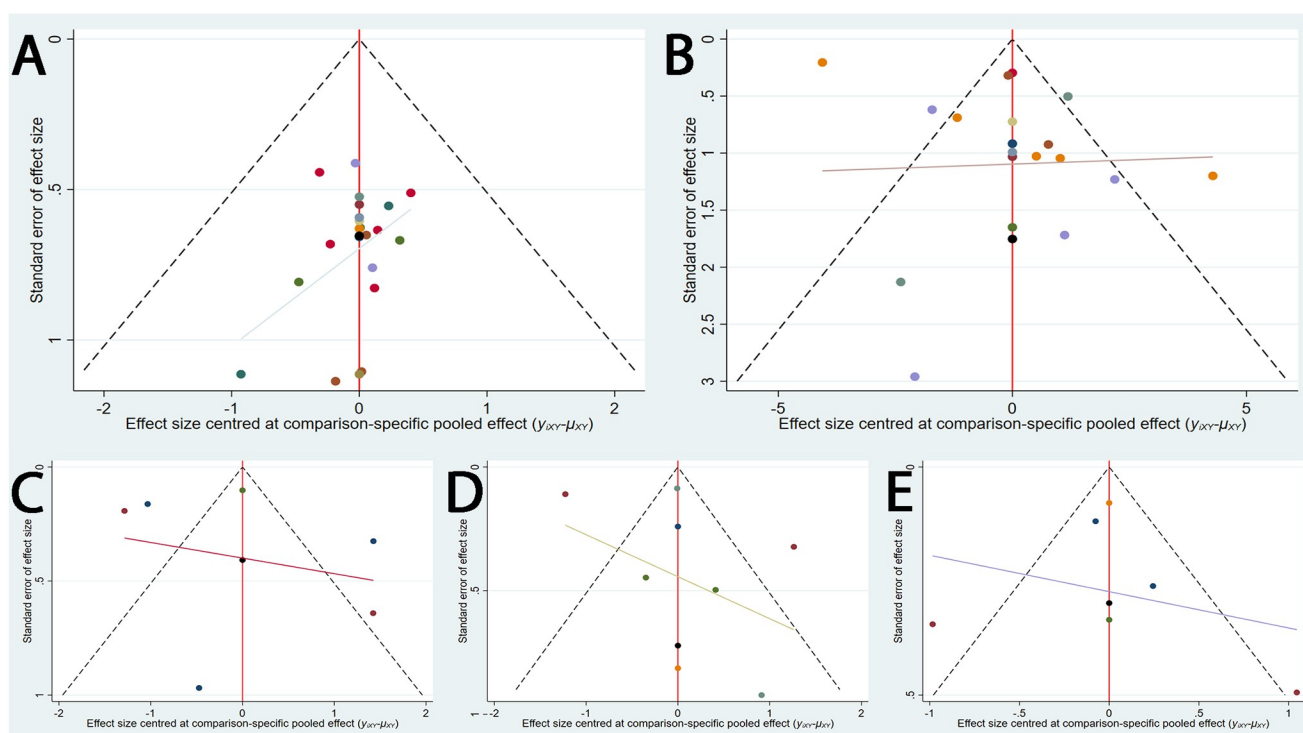

Fig 4. Funnel plots (A) Clinical effective rate; (B) NIH-CPSI Total Score; (C) Pain Score; (D) Voiding Score; (E) Quality-of-Life Score.

<https://doi.org/10.1371/journal.pone.0280821.g004>

In reference to total effective rate,  $\alpha$ -RBs+ needling was most likely to be optimal treatment. Concerning NIH-CPSI total score,  $\alpha$ -RBs+ moxibustion+ auricular point sticking was most likely to be optimal treatment, the therapy ranking second was  $\alpha$ -RBs+ needling, and the therapy ranking third was  $\alpha$ -RBs+ moxibustion. In regard to pain score,  $\alpha$ -RBs+ moxibustion was most likely to be optimal treatment. In reference to voiding and quality-of-life score, there was no statistically significant difference between the efficacy of various interventions. In summary,  $\alpha$ -RBs+ needling,  $\alpha$ -RBs+ moxibustion, and  $\alpha$ -RBs+ moxibustion+ auricular point sticking, provided relatively good clinical efficacy. In these treatments, attention should be paid on  $\alpha$ -RBs+ needling and  $\alpha$ -RBs+ moxibustion which ranked higher many times in the evaluation of various outcome indicators.

CP/CPPS falls into category III prostatitis of National Institutes of Health (NIH) classification, of which the definition is that pelvic and urinary pain or discomfort lasts for at least 3 months within first 6 months which is associated with urinary symptoms and no proof of bacterial infection [4]. The pathogenesis of CP/CPPS may include infection, reflux, defective function of urothelial of lower urinary tract, anxiety depressive state, pelvis-related disease, inflammatory, immunology response, etc. This is a question worth discussing due to perplexing etiology [38–43]. In current clinical practice, there remain to be no gold standard of diagnostic tests, so the diagnosis of CP/CPPS is commonly based on exclusive diagnosis methods [2, 44, 45]. Therefore, effectiveness of treatment of CP/CPPS is also unsatisfactory [46].

$\alpha$ -RBs is an important adjuvant tool in the clinical treatment of CP/CPPS [47]. Bladder neck and prostate gland are rich in  $\alpha$  receptors which are in the central nervous system and are related to chronic pain syndrome.  $\alpha$ -RBs block the  $\alpha$  adrenergic receptors in the prostate selectively to make the smooth muscle of prostate relax resulting in promoting voiding of urinary bladder and improving the symptom of dysuria as well as interact with sympathetic nerve of pelvic diaphragm to alleviate tension pain and reduce the incidence of lower urinary tract neurogenic inflammation [47–49]. Needling and moxibustion are traditional types of therapy of traditional Chinese medicine external therapies. In 1997, the value of needling in the treatment of pain and/or inflammation resulting from various diseases was recognized by National Institutes of Health [50]. Mechanism of therapeutic effect of needling on CP/CPPS includes the follows: 1. Immunomodulatory effect. Immune-related factors play a crucial role in the pathogenesis of CP/CPPS. Needling can modulate inflammatory factors and immunocytes by downgrading the level of proinflammatory factors, upgrading anti-inflammatory and adjusting inflammatory regulators. Multiple studies showed that needling can activate vagus nerve to inhibit the macrophage activation and production of proinflammatory factors and promote dopamine generation of adrenal medulla, which can control the inflammation [50, 51]. In addition, needling can also lead to an increase in the level of natural killer (NK) cells in the blood which can yield T cell helper factors related to remission of diseases and modulate immune to keep the inflammation in check [52–54]. 2. Improving urodynamics. Voiding dysfunction is one of main symptoms of CP in which pelvic floor muscle dysfunction may play an important role; and spastic pelvic floor syndrome is closely associated with pelvic tenderness of patients with CP/CPPS [55]. Many studies indicated that urodynamics and voiding dysfunction can be improved by acupuncture which regulates pelvic floor muscle contractility [56, 57]. 3. Regulating blood circulation. Most of patients with CP/CPPS suffer from pelvic congestion syndrome with blood circulation and microcirculation dysfunction [58]. Studies showed that needling can improve venous circulation which is suggested by pelvic magnetic resonance venography imaging [59]. Moxibustion features high safety and low cost and so on including moxibustion on governor vessel acupoints, cotton moxibustion, medicinal thread moxibustion and pyretic moxibustion and the such [60]. Studies concerning moxibustion in the treatment of chronic CP/CPPS are relative less nowadays which indicated that the primary mechanism of moxibustion in

the treatment of CP/CPPS is to improve whole blood reduced viscosity, white blood cell rigidity index, aggregation index and the level of fibrinogen to ameliorate hemorheology state by exerting thermal stimulation on blood vessel and tissues [28, 61]. When moxibustion is combined with antipyretics-analgesic and anti-inflammatory drugs, anti-inflammatory and analgesic effect can be enhanced because the combination therapy can downgrade inflammatory factors, which is suggested by many studies [62, 63]. Auricular point sticking can significantly and effectively relieve pain, mechanism of which is to increase the concentration of plasma  $\beta$ -endorphin [64, 65]. The above studies provided the rationale about the feasibility of the combination therapy of  $\alpha$ -RBs and traditional Chinese medicine external therapy represented by needling, moxibustion, and auricular point sticking in the treatment of CP/CPPS. In previous published papers, it was found that  $\alpha$ -RBs alone or traditional Chinese medicine external therapy alone could effectively relieve CP/CPPS symptoms compared with placebo [5, 66, 67]. This study innovatively pointed out that combination therapy of  $\alpha$ -RBs and traditional Chinese medicine external therapy was superior to  $\alpha$ -RBs alone or traditional Chinese medicine external therapy alone with respective to all outcomes, which can be used for reference by clinicians.

Dealing with CP/CPPS is a challenging task, and we cannot effectively manage CP/CPPS at present. One study showed that placebo can significantly improve CP/CPPS symptoms, and it is believed that anticipatory pain relief is one of the main mechanisms of placebo analgesia, and a series of complementary and alternative therapies such as external treatment of traditional Chinese medicine also have placebo effect to some extent. This suggests that the placebo effect is significant in alleviating CP/CPPS and deserves further study [68, 69].

However, there exist numerous limitations in this study:

First, the heterogeneity of protocols used for each Chinese medicine external therapy limits comparisons between studies;

Second, definition of clinical efficacy varied among the studies limits the comparison; Third, CP/CPPS was composed of two types (inflammatory IIIA, non-inflammatory, IIIB), most of the studies did not specify the type of CP/CPPS, which limited the comparison between studies;

Fourth, most of the results were deduced from indirect comparison;

Fifth, the quality of involving studies may be not high and the number of studies included in the analysis with respected to part of outcome indicators was less, potentially compromising the robustness of the results.

## Conclusion

Based on Bayesian algorithm, network meta-analysis was made to compare the efficacy of 12 interventions in this study. The results of this study implicated:  $\alpha$ -RBs+ needling,  $\alpha$ -RBs+ moxibustion and  $\alpha$ -RBs+ moxibustion+ auricular point sticking had better clinical effect in the treatment of CP/CPPS. In these treatments, attention should be paid on  $\alpha$ -RBs+ needling and  $\alpha$ -RBs+ moxibustion which ranked higher many times in various outcome indicators. Results of this study can guide and promote the clinical application of  $\alpha$ -RBs+ traditional Chinese medicine external therapy. Meanwhile, large-sample clinical randomized control trials with a rigor design following the evidence-based medicine standards need to be conducted to explore the clinical effect of  $\alpha$ -RBs+ traditional Chinese medicine external therapy in the treatment of CP/CPPS to achieve a more objective and justified conclusion.

## Supporting information

**S1 File. Search strategy.**  
(DOCX)



**S1 Table. PRISMA 2020 checklist.**  
(DOCX)

**S2 Table. Outcomes as reported in trials included in the network meta-analysis.**  
(XLSX)

## Author Contributions

**Methodology:** Kaiyu Zhang, Yi Zhang, Shengwei Hong.

**Software:** Kaiyu Zhang, Yi Zhang, Shengwei Hong, Yutian Cao.

**Supervision:** Yutian Cao.

**Writing – original draft:** Kaiyu Zhang, Yi Zhang, Shengwei Hong.

**Writing – review & editing:** Chengjiang Liu.

## References

1. Manfredi C, Calace FP, Fusco F, Quattrone C, Giordano D, Crocetto F, et al. Escherichia coli Nissle 1917 as adjuvant therapy in patients with chronic bacterial prostatitis: a non-blinded, randomized, controlled trial. *World J Urol.* 2021 Dec; 39(12):4373–4379. <https://doi.org/10.1007/s00345-021-03773-8> PMID: 34213584
2. Krieger JN, Nyberg L Jr, Nickel JC. NIH consensus definition and classification of prostatitis. *JAMA.* 1999 Jul 21; 282(3):236–237. <https://doi.org/10.1001/jama.282.3.236> PMID: 10422990
3. Kwon JK, Chang IH. Pain, catastrophizing, and depression in chronic prostatitis/chronic pelvic pain syndrome. *Int Neurourol J.* 2013 Jun; 17(2):48–58. <https://doi.org/10.5213/inj.2013.17.2.48> PMID: 23869268
4. Engeler DS, Baranowski AP, Dinis-Oliveira P, Elneil S, Hughes J, Messelink EJ, et al. The 2013 EAU guidelines on chronic pelvic pain: is management of chronic pelvic pain a habit, a philosophy, or a science? 10 years of development. *Eur Urol.* 2013 Sep; 64(3):431–439. <https://doi.org/10.1016/j.eururo.2013.04.035> PMID: 23684447
5. Deng W, Du X, Zhou W, Mei X, Tian Y, Chen L, et al. Systematic review and meta-analysis:  $\alpha$ -adrenergic receptor blockers in chronic prostatitis. *Ann Palliat Med.* 2021 Sep; 10(9):9870–9878. <https://doi.org/10.21037/apm-21-2160> PMID: 34628913
6. Liao XH, Chen JQ, Wu JT, Cheng JL, Wang F. Medication versus health education for patients with type III prostatitis-like symptoms: A prospective randomized control study. *Zhonghua Nan Ke Xue.* 2019 May; 25(5):420–423.
7. Franco JV, Turk T, Jung JH, Xiao YT, Iakhno S, Tirapegui FI, et al. Pharmacological interventions for treating chronic prostatitis/chronic pelvic pain syndrome. *Cochrane Database Syst Rev.* 2019 Oct 6; 10(10):CD012552. <https://doi.org/10.1002/14651858.CD012552.pub2> PMID: 31587256
8. Chen Y, Wu X, Liu J, Tang W, Zhao T, Zhang J. Effects of a 6-month course of tamsulosin for chronic prostatitis/chronic pelvic pain syndrome: a multicenter, randomized trial. *World J Urol.* 2011 Jun; 29(3):381–385. <https://doi.org/10.1007/s00345-010-0537-3> PMID: 20336302
9. Mehik A, Alas P, Nickel JC, Sarpola A, Helström PJ. Alfuzosin treatment for chronic prostatitis/chronic pelvic pain syndrome: a prospective, randomized, double-blind, placebo-controlled, pilot study. *Urology.* 2003 Sep; 62(3):425–429. [https://doi.org/10.1016/s0090-4295\(03\)00466-7](https://doi.org/10.1016/s0090-4295(03)00466-7) PMID: 12946740
10. Sun Y, Liu Y, Liu B, Zhou K, Yue Z, Zhang W, et al. Efficacy of Acupuncture for Chronic Prostatitis/Chronic Pelvic Pain Syndrome: A Randomized Trial. *Ann Intern Med.* 2021 Oct; 174(10):1357–1366. <https://doi.org/10.7326/M21-1814> PMID: 34399062
11. Ma W, Hu Q, Diao L, Cai Y, Feng J. The effect of drug oil moxibustion for contents of Zinc and C-reactive protein in succus prostaticus of chronic nonbacterial prostatitis. *Zhongguo Zhen Jiu.* 2017 Aug 12; 37(8):840–844. Chinese. <https://doi.org/10.13703/j.0255-2930.2017.08.011> PMID: 29231344
12. Ma Y, Li X, Li F, Yu W, Wang Z. Clinical research of chronic pelvic cavity pain syndrome treated with acupoint catgut embedding therapy. *Zhongguo Zhen Jiu.* 2015 Jun; 35(6):561–566. PMID: 26480553
13. Hutton B, Salanti G, Caldwell DM, Chaimani A, Schmid CH, Cameron C, et al. The PRISMA extension statement for reporting of systematic reviews incorporating network meta-analyses of health care interventions: checklist and explanations. *Ann Intern Med.* 2015 Jun 2; 162(11):777–784. <https://doi.org/10.7326/M14-2385> PMID: 26030634

14. Zaidi N, Thomas D, Chughtai B. Management of Chronic Prostatitis (CP). *Curr Urol Rep*. 2018 Aug 31; 19(11):88. <https://doi.org/10.1007/s11934-018-0841-9> PMID: 30167899
15. Rees J, Abrahams M, Doble A, Cooper A; Prostatitis Expert Reference Group (PERG). Diagnosis and treatment of chronic bacterial prostatitis and chronic prostatitis/chronic pelvic pain syndrome: a consensus guideline. *BJU Int*. 2015 Oct; 116(4):509–525. <https://doi.org/10.1111/bju.13101> PMID: 25711488
16. Pati D, Lorusso LN. How to Write a Systematic Review of the Literature. *HERD*. 2018 Jan; 11(1):15–30. <https://doi.org/10.1177/1937586717747384> PMID: 29283007
17. Sterne JAC, Savović J, Page MJ, Elbers RG, Blencowe NS, Boutron I, et al. RoB 2: a revised tool for assessing risk of bias in randomised trials. *BMJ*. 2019 Aug 28; 366: l4898. <https://doi.org/10.1136/bmj.l4898> PMID: 31462531
18. Li H. The Clinical Research on Treating Chronic Pelvic Pain Syndrome with TCM combined with Western Medicine. M.Sc. Thesis, Hubei University of Traditional Chinese Medicine.2010. <https://kns.cnki.net/KCMS/detail/detail.aspx?dbname=CMFD2011&filename=2010254050.nh>
19. Wang GQ. Clinical observation of the treatment of IIIb chronic prostatitis by catgut implantation at acupoint and Terazosin. *China Medical Herald*.2011; 8(4):66–67.
20. Qi XL, Pan FT, Wu WZ. Effect of Acupuncture on Cytokines in Chronic Nonbacterial Prostatitis. *Shandong J Traditi Chin Med*.2012; 31(06):418–420.
21. Wang XG, Wei DM. Clinical study of Ding Guitie combined with terazosin hydrochloride in the treatment of type III prostatitis. *Chin Comm Doc*.2013; 15(05):94–95.
22. Wang Y, Liu F, Xu XL, Zhu KC. Clinical outcome of combination therapy of electro-acupuncture at Sanyin acupoint with  $\alpha$ -blockers in the treatment of type III prostatitis. *Shanghai Med*.2014; 37(11):975–977. Available from: <http://qikan.cqvip.com/Qikan/Article/Detail?id=663404398>
23. Wang CP, Xu Y. Observation on therapeutic effect of doxazosin combined with ear point pressing bean and abdominal suspension moxibustion on CP/CPSS. *Shandong Med*.2014; 54(40):34–35.
24. Gao S, Cai GF. Therapeutic Observation of Acupuncture-moxibustion for Chronic Non-bacterial Prostatitis. *Shanghai J Acu-mox*.2015; 34(09):66–68. <https://doi.org/10.13460/j.issn.1005-0957.2015.09.0861>
25. Li GD, Li SY. Effect of ginger-partitioned moxibustion on immunocytokines in patients with chronic non-bacterial prostatitis. *J Acupunct Tuina Sci*.2015(2):116–120. <https://doi.org/10.1007/s11726-015-0833-y>
26. Zhang RM. Ninety Cases of Chronic Prostatitis Treated by Combination of Magnetic Acupoint Sticking Application and Tamsulosin Hydrochloride Sustained-release Tablets. *Shandong J Traditi Chin Med*.2017; 36(10):853–855. <https://doi.org/10.16295/j.cnki.0257-358x.2017.10.009>
27. Guo J, Chen BH. Therapeutical Effect and Mechanism Study of Using Ginger-partitioned Moxibustion Combined with Tamsulosin in the Treatment of Chronic Prostatitis/Chronic Pelvic Pain Syndrome (CP/CPSS) Patients. *Sichuan Traditi Chin Med*.2018; 36(01):178–181. Available from: <https://kns.cnki.net/KCMS/detail/detail.aspx?dbcode=CJFD&filename=SCZY201801071>
28. Li BT, Zhang Y, Xie HW. Clinical observation and influence on blood rheology of heat sensitive moxibustion combined with Tamsulosin Hydrochloride Sustained Release Capsule for the treatment of chronic prostatitis. *CHN J Traditi Chin Med and Phar*.2018; 33(12):5694–5696. Available from: <https://kns.cnki.net/KCMS/detail/detail.aspx?dbcode=CJFD&filename=BXYY201812111>
29. Zhang SY. Clinical observation on the treatment of type III prostatitis with moxa salt hot ironing combined with drugs. *CHN Health Vision*.2018(4):132–133.
30. Zhu YX, Xu NG. Clinical treatment of chronic nonbacterial prostatitis of kidney yang deficiency type by acupuncture of Sanhuangpoints. *Acupunc Res*. 2019; 44(06):443–445+458. <https://doi.org/10.13702/j.1000-0607.180693> PMID: 31368269
31. Chen YZ, Wang LJ, Wang W. Clinical Observation on the Curative Effect of Umbilical Acupuncture on Chronic Prostatitis. *Inner Mongolia J Traditi Chin Med*.2019; 38(11):141–143.
32. Gao W, Li Q, Liu YQ, Li HS, Shi CX. Clinical research on the therapeutic effect of governor vessel moxibustion on chronic pelvic pain syndromes. *The Medical Forum*.2020; 24(1):104–106. <https://doi.org/10.19435/j.1672-1721.2020.01.065>
33. Zeng L, Tan SH, Fang Y, Chang XR, Deng JQ. Summary of 15 cases of chronic prostatitis treated by moxibustion combined with tamsulosin sustained-release capsule. *Hunan J Traditi Chin Med*.2021; 37(11):76–78.
34. Liang QF, Liu BP, Chen XH, Xiao W, Li SQ, He Y, et al. Therapeutic effect of acupuncture combined with medication on chronic prostatitis of damp and heat stasis. *Zhongguo Zhen Jiu*.2021; 41(02):149–152. <https://doi.org/10.13703/j.0255-2930.20200219-0004> PMID: 33793110
35. Wang ZP, Wang J, Zhou H. Observation on the effect of traditional Chinese medicine acupoint application combined with Tanluoxin hydrochloride capsule on chronic prostatitis. *Inner Mongolia J Traditi Chin Med*.2021; 40(08):126–127.

36. Lu JG. Clinical observation of terazosin combined with acupoint catgut embedding in the treatment of type IIIb chronic prostatitis. *The world of Health Living*. 2021(7):35. Available from: [https://www.zhangqiaokeyan.com/academic-journal-cn\\_world-healthy-living\\_thesis/0201290253956.html](https://www.zhangqiaokeyan.com/academic-journal-cn_world-healthy-living_thesis/0201290253956.html)
37. Jansen JP, Crawford B, Bergman G, Stam W. Bayesian meta-analysis of multiple treatment comparisons: an introduction to mixed treatment comparisons. *Value Health*. 2008 Sep-Oct; 11(5):956–64. <https://doi.org/10.1111/j.1524-4733.2008.00347.x> PMID: 18489499
38. Choi JB, Lee SJ, Kang SR, Lee SS, Choe HS. Analysis of bacterial community using pyrosequencing in semen from patients with chronic pelvic pain syndrome: a pilot study. *Transl Androl Urol*. 2020 Apr; 9(2):398–404. <https://doi.org/10.21037/tau.2020.02.05> PMID: 32420145
39. Persson BE, Ronquist G. Evidence for a mechanistic association between nonbacterial prostatitis and levels of urate and creatinine in expressed prostatic secretion. *J Urol*. 1996 Mar; 155(3):958–960. PMID: 8583617
40. Parsons CL. Prostatitis, interstitial cystitis, chronic pelvic pain, and urethral syndrome share a common pathophysiology: lower urinary dysfunctional epithelium and potassium recycling. *Urology*. 2003 Dec; 62(6):976–982. [https://doi.org/10.1016/s0090-4295\(03\)00774-x](https://doi.org/10.1016/s0090-4295(03)00774-x) PMID: 14665339
41. Giannantoni A, Porena M, Gubbiotti M, Maddonni S, Di Stasi SM. The efficacy and safety of duloxetine in a multidrug regimen for chronic prostatitis/chronic pelvic pain syndrome. *Urology*. 2014 Feb; 83(2):400–405. <https://doi.org/10.1016/j.urology.2013.09.024> PMID: 24231216
42. Pavone C, Caldarera E, Liberti P, Miceli V, Di Trapani D, Serretta V, et al. Correlation between chronic prostatitis syndrome and pelvic venous disease: a survey of 2,554 urologic outpatients. *Eur Urol*. 2000 Apr; 37(4):400–403. <https://doi.org/10.1159/000020185> PMID: 10765069
43. Zhang M, Liu Y, Chen J, Chen L, Meng J, Yang C, et al. Single-cell multi-omics analysis presents the landscape of peripheral blood T-cell subsets in human chronic prostatitis/chronic pelvic pain syndrome. *J Cell Mol Med*. 2020 Dec; 24(23):14099–14109. <https://doi.org/10.1111/jcmm.16021> PMID: 33124198
44. McNaughton C, Mac Donald R, Wilt T. Interventions for chronic abacterial prostatitis. *Cochrane Database Syst Rev*. 2001; 1999(1):CD002080. <https://doi.org/10.1002/14651858.CD002080> PMID: 11279750
45. McNaughton Collins M, MacDonald R, Wilt TJ. Diagnosis and treatment of chronic abacterial prostatitis: a systematic review. *Ann Intern Med*. 2000 Sep 5; 133(5):367–381. <https://doi.org/10.7326/0003-4819-133-5-200009050-00013> PMID: 10979882
46. Liang CZ, Zhang XJ, Hao ZY, Yang S, Wang DB, Shi HQ, et al. An epidemiological study of patients with chronic prostatitis. *BJU Int*. 2004 Sep; 94(4):568–570. <https://doi.org/10.1111/j.1464-410X.2004.05002.x> PMID: 15329114
47. Schwinn DA. The role of alpha1-adrenergic receptor subtypes in lower urinary tract symptoms. *BJU Int*. 2001 Sep; 88 Suppl 2:27–34; discussion 49–50. <https://doi.org/10.1046/j.1464-410x.2001.00116.x> PMID: 11589667
48. Andersson KE, Gratzke C. Pharmacology of alpha1-adrenoceptor antagonists in the lower urinary tract and central nervous system. *Nat Clin Pract Urol*. 2007 Jul; 4(7):368–378. <https://doi.org/10.1038/ncpuro0836> PMID: 17615548
49. Geppetti P, Nassini R, Materazzi S, Benemei S. The concept of neurogenic inflammation. *BJU Int*. 2008 Mar; 101 Suppl 3:2–6. <https://doi.org/10.1111/j.1464-410X.2008.07493.x> PMID: 18307678
50. Kavoussi B, Ross BE. The neuroimmune basis of anti-inflammatory acupuncture. *Integr Cancer Ther*. 2007 Sep; 6(3):251–257. <https://doi.org/10.1177/1534735407305892> PMID: 17761638
51. Torres-Rosas R, Yehia G, Peña G, Mishra P, del Rocio Thompson-Bonilla M, Moreno-Eutimio MA, et al. Dopamine mediates vagal modulation of the immune system by electroacupuncture. *Nat Med*. 2014 Mar; 20(3):291–295. <https://doi.org/10.1038/nm.3479> PMID: 24562381
52. Lee SW, Liong ML, Yuen KH, Krieger JN. Acupuncture and immune function in chronic prostatitis/chronic pelvic pain syndrome: a randomized, controlled study. *Complement Ther Med*. 2014 Dec; 22(6):965–969. <https://doi.org/10.1016/j.ctim.2014.10.010> PMID: 25453515
53. Vykhovanets EV, Resnick MI, Marengo SR. The healthy rat prostate contains high levels of natural killer-like cells and unique subsets of CD4+ helper-inducer T cells: implications for prostatitis. *J Urol*. 2005 Mar; 173(3):1004–1010. <https://doi.org/10.1097/01.ju.0000149130.06055.f2> PMID: 15711366
54. Yamaguchi Y, Takahashi H, Satoh T, Okazaki Y, Mizuki N, Takahashi K, et al. Natural killer cells control a T-helper 1 response in patients with Behçet's disease. *Arthritis Res Ther*. 2010; 12(3): R80. <https://doi.org/10.1186/ar3005> PMID: 20459787
55. Khorasani B, Arab AM, Sedighi Gilani MA, Samadi V, Assadi H. Transabdominal ultrasound measurement of pelvic floor muscle mobility in men with and without chronic prostatitis/chronic pelvic pain syndrome. *Urology*. 2012 Sep; 80(3):673–677. <https://doi.org/10.1016/j.urology.2012.05.026> PMID: 22925244

56. Zhang J, Liu CD, Ding Y, Tang QB. Clinical observation on therapeutic effect of electroacupuncture on chronic prostatitis and detection of urethral sphincter EMG. *Zhongguo Zhen Jiu*. 2010 Jan; 30(1):13–17. PMID: [20353107](#)
57. Chen YL, Shen PF, Chen GM, Zhang LJ. Experimental Study on the Effect of Electroacupuncture of “Huiyang” and “Zhonglushu” on Urodynamics in Nonbacterial Prostatitis Rats. *Acupunc Res*. 2001 (02):127–130.
58. Sugaya K, Kadekawa K, Unten Y, Nishijima S, Ashitomi K, Yamamoto H. Relationship of blood flow in the common iliac vein to lower urinary tract disease. *J Med Ultrason* (2001). 2019 Apr; 46(2):223–229. <https://doi.org/10.1007/s10396-019-00927-5> PMID: [30737603](#)
59. Honjo H, Kamoi K, Naya Y, Ukimura O, Kojima M, Kitakoji H, et al. Effects of acupuncture for chronic pelvic pain syndrome with intrapelvic venous congestion: preliminary results. *Int J Urol*. 2004 Aug; 11(8):607–612. <https://doi.org/10.1111/j.1442-2042.2004.00868.x> PMID: [15285750](#)
60. Zou J, Huang G, Hu C, Yan J, Zhang F, Shi H, et al. Moxibustion therapy for treating psoriasis vulgaris: A protocol for systematic review and meta-analysis. *Medicine (Baltimore)*. 2021 Mar 26; 100(12):e25250. <https://doi.org/10.1097/MD.00000000000025250> PMID: [33761722](#)
61. Wu X, Cheng K, Xu C, Liu S, Sun Q, Yang Z, et al. Mechanism of Acupuncture and Moxibustion on Chronic Prostatitis/Chronic Pelvic Pain Syndrome: A Narrative Review of Animal Studies. *Pain Res Manag*. 2021 Dec 8; 2021:2678242. <https://doi.org/10.1155/2021/2678242> PMID: [34925658](#)
62. Wang Y, Tao S, Yu Z, Luo Y, Li Y, Tang J, et al. Effect of Moxibustion on  $\beta$ -EP and Dyn Levels of Pain-Related Indicators in Patients with Rheumatoid Arthritis. *Evid Based Complement Alternat Med*. 2021 Apr 3; 2021: 6637554. <https://doi.org/10.1155/2021/6637554> PMID: [33884025](#)
63. Gong Y, Yu Z, Wang Y, Xiong Y, Zhou Y, Liao CX, et al. Effect of Moxibustion on HIF-1 $\alpha$  and VEGF Levels in Patients with Rheumatoid Arthritis. *Pain Res Manag*. 2019 Nov 27; 2019:4705247. <https://doi.org/10.1155/2019/4705247> PMID: [31885755](#)
64. Liu M, Tong Y, Chai L, Chen S, Xue Z, Chen Y, et al. Effects of Auricular Point Acupressure on Pain Relief: A Systematic Review. *Pain Manag Nurs*. 2021 Jun; 22(3):268–280. <https://doi.org/10.1016/j.pmn.2020.07.007> PMID: [32950391](#)
65. Li Y, Du JL, Hao PL, Zhang MX, Jiang YB, Shu M, et al. Effect of auricular point sticking therapy on peri-operative pain in patients with partial lung resection. *Zhongguo Zhen Jiu*. 2021 Jun 12; 41(6):603–607. <https://doi.org/10.13703/j.0255-2930.20200505-k0003> PMID: [34085475](#)
66. Qin Z, Wu J, Tian J, Zhou J, Liu Y, Liu Z. Network Meta-Analysis of the Efficacy of Acupuncture, Alpha-blockers and Antibiotics on Chronic Prostatitis/Chronic Pelvic Pain Syndrome. *Sci Rep*. 2016 Oct 19; 6:35737. <https://doi.org/10.1038/srep35737> PMID: [27759111](#)
67. Anothaisintawee T, Attia J, Nickel JC, Thammakraisorn S, Numthavaj P, McEvoy M, et al. Management of chronic prostatitis/chronic pelvic pain syndrome: a systematic review and network meta-analysis. *JAMA*. 2011 Jan 5; 305(1):78–86. <https://doi.org/10.1001/jama.2010.1913> PMID: [21205969](#)
68. Cohen JM, Fagin AP, Hariton E, Niska JR, Pierce MW, Kuriyama A, et al. Therapeutic intervention for chronic prostatitis/chronic pelvic pain syndrome (CP/CPPS): a systematic review and meta-analysis. *PLoS One*. 2012; 7(8): e41941. <https://doi.org/10.1371/journal.pone.0041941> PMID: [22870266](#)
69. McGeeney BE. Acupuncture is all placebo and here is why. *Headache*. 2015 Mar; 55(3):465–469. <https://doi.org/10.1111/head.12524> PMID: [25660556](#)
